# Supplementary material for: Propionate exerts neuroprotective and neuroregenerative effects in the peripheral nervous system
Source: PubMed Central journal article supplement — Proc Natl Acad Sci U S A. 2023 Jan 20;120(4):e2216941120. doi: 10.1073/pnas.2216941120 (PMC9942889; doi:10.1073/pnas.2216941120), 2023-01-20
Supplement: pnas.2216941120.sapp.pdf [file pnas.2216941120.sapp.pdf]

## **Supporting Information for** Propionate exerts neuroprotective and neuroregenerative effects in the peripheral nervous system

Thomas Grüter<sup>1</sup>, Nuwin Mohamad<sup>1</sup>, Niklas Rilke<sup>1</sup>, Alina Blusch<sup>1</sup>, Melissa Sgodzai<sup>1</sup>, Seray Demir<sup>1</sup>,  
Xiomara Pedreiturria<sup>1</sup>, Katharina Lemhoefer<sup>1</sup>, Barbara Gisevius<sup>1</sup>, Aiden Haghikia<sup>1,2</sup>, Anna Lena  
Fisse<sup>1</sup>, Jeremias Motte<sup>1</sup>, Ralf Gold<sup>1</sup>, Kalliopi Pitarokoili<sup>1</sup>

<sup>1</sup> Department of Neurology, St. Josef Hospital, Ruhr University Bochum, 44791 Bochum,  
Germany.

<sup>2</sup> Department of Neurology, Otto-von-Guericke University, 39120 Magdeburg, Germany.

Corresponding author: Dr. Thomas Grüter  
Email: [Thomas.grueter@rub.de](mailto:Thomas.grueter@rub.de)

### **This PDF file includes:**

Figures S1 to S2

Fig. S1. :

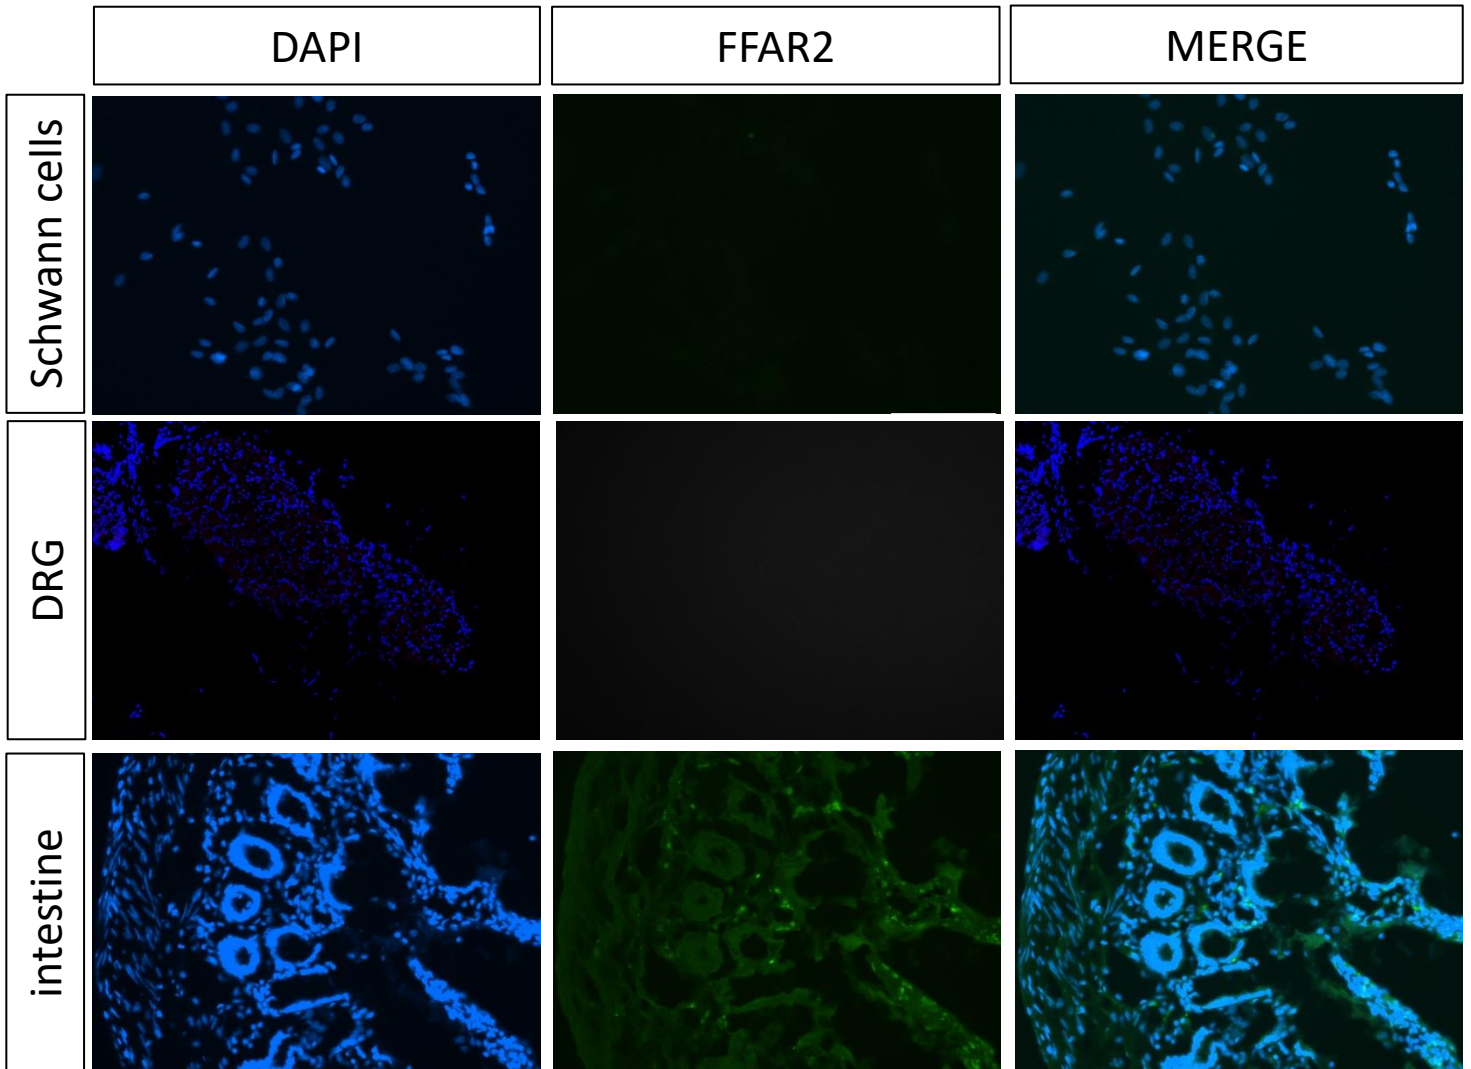

**No evidence of the free fatty acid receptor 2 on Schwann cells and dorsal root ganglia.**  
The free fatty acid receptor 2 was not evident immunohistochemically in Schwann cells and dorsal root ganglia. Immunohistochemically staining of the intestine served as a positive control.

Fig. S2. :

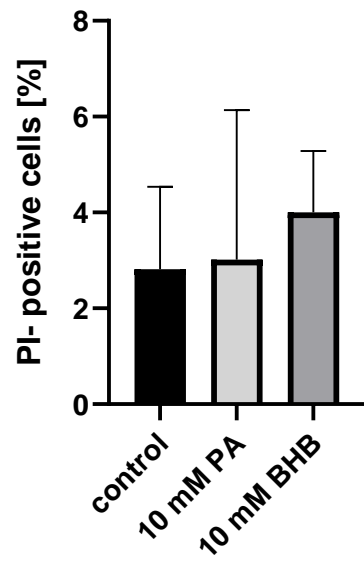

Neither propionate (PA) nor  $\beta$ -hydroxybutyric acid (BHB) showed any toxic effect on naïve Schwann cells in a very high concentration of 10 mM.
